# Supplementary material for: Malignant mesothelioma among US Medicare beneficiaries: incidence, prevalence and therapy, 2016–2019
Source: HighWire-hosted journal article supplement (doi:10.1136/oemed-2022-108706), 2023-01-12
Supplement: oemed-2022-108706supp001_data_supplement.pdf [file oemed-2022-108706supp001_data_supplement.pdf]

**Table Supplement 1. Codes to identify narrow case definition and treatment therapy**

| Code Type                                         | Narrow Mesothelioma Case Definition Codes                                                                                                                                                                                                                                                                                                                                                                                                                                                                             | Treatment Therapy Codes                                                                                                                                                                                                                                                                                                                                                                                                                                                                                                                                                                                                                                                                                                                                                                                                                                                                                                                                                                                                                                                                                                                                                                                                                                                                                                                    |
|---------------------------------------------------|-----------------------------------------------------------------------------------------------------------------------------------------------------------------------------------------------------------------------------------------------------------------------------------------------------------------------------------------------------------------------------------------------------------------------------------------------------------------------------------------------------------------------|--------------------------------------------------------------------------------------------------------------------------------------------------------------------------------------------------------------------------------------------------------------------------------------------------------------------------------------------------------------------------------------------------------------------------------------------------------------------------------------------------------------------------------------------------------------------------------------------------------------------------------------------------------------------------------------------------------------------------------------------------------------------------------------------------------------------------------------------------------------------------------------------------------------------------------------------------------------------------------------------------------------------------------------------------------------------------------------------------------------------------------------------------------------------------------------------------------------------------------------------------------------------------------------------------------------------------------------------|
| Healthcare Common Procedure Coding System (HCPCS) | -Incision Procedures on the Lungs and Pleura, 32035-32225<br>-Introduction and Removal procedures of the Lungs and Pleura, 32550-32557<br>-Thoracoscopy Video Assisted Thoracic Surgery (VATS) on the Lungs and Pleura, 32601-32674<br>-Diagnostic Radiology Procedures of the Chest, 71045-71555<br>-Diagnostic Radiology Procedures of the Abdomen, 74018-74190<br>-Diagnostic Ultrasound Procedures of the Chest, 76604-76642<br>-Diagnostic Ultrasound Procedures of the Abdomen and Retroperitoneum, 76700-76776 | <u>Chemotherapy</u><br>-Chemotherapy Administration, G0498<br>-Specific Chemotherapy Drugs Administered Intravenously, J9000-J9999<br>-Chemotherapy Administration, Q0083-Q0085<br>-Chemotherapy Administration, 96400-96549<br><br><u>Radiation Oncology</u><br>-Radiation Treatment Delivery, 77401-77417<br>-Neutron Beam Treatment Delivery, 77423-77425<br>-Radiation Treatment Management, 77427-77499<br>-Proton Beam Radiation Treatment Delivery, 77520, 77523<br>-Radiation Oncology Treatment, 77750-77799<br>-High Dose Rate Electronic Brachytherapy Procedure, 0394T, 0395T<br>-Radiation Therapy Services, G6001-G6017<br>-Stereotactic Radiation Therapy, 32701<br><br><u>Surgical Procedures</u><br>-Incision Procedures on the Lungs and Pleura, 32035-32225<br>-Excision/Resection, 32310-32408<br>-Removal Procedures on the Lungs and Pleura, 32440-32540<br>-Introduction and Removal procedures of the Lungs and Pleura, 32550-32557<br>-Destruction Procedures on the Lungs and Pleura, 32560-32562<br>-Thoracoscopy VATS on the Lungs and Pleura, 32601-32674<br>-Repair Procedures on the Lungs and Pleura, 32800-32820<br>-Lung Transplantation Procedures, 32850-32856<br>-Surgical Collapse Therapy Procedures on the Lungs and Pleura, 32900-32960<br>-Other Procedures on the Lungs and Pleura, 32994-32999 |
| ICD-10-Procedure Coding System (ICD-10-PCS)       | -Any code with “B” as first character indicating “Imaging procedure” (e.g., radiography, fluoroscopy, CT, MRI, ultrasound) of: <ul style="list-style-type: none"> <li>• Upper arteries (B3)</li> <li>• Lower arteries (B4)</li> <li>• Veins (B5)</li> </ul>                                                                                                                                                                                                                                                           | <u>Chemotherapy</u><br>-Introduce Other Antineoplastic in Peripheral Vein, 3E03305<br>-Introduce Other Antineoplastic in Central Vein, 3E04305<br>-Introduce Blinatumomab Antineoplastic Immunotherapy into Central Vein, XW03351                                                                                                                                                                                                                                                                                                                                                                                                                                                                                                                                                                                                                                                                                                                                                                                                                                                                                                                                                                                                                                                                                                          |

|                 |                                                                                                                                                                                                                                                                                                                                                                                                                                                                                                                                                                                                                                                          |                                                                                                                                                                                                                                                                                                                                                                                                                                                                                                                                                                                                                                                                                                                      |
|-----------------|----------------------------------------------------------------------------------------------------------------------------------------------------------------------------------------------------------------------------------------------------------------------------------------------------------------------------------------------------------------------------------------------------------------------------------------------------------------------------------------------------------------------------------------------------------------------------------------------------------------------------------------------------------|----------------------------------------------------------------------------------------------------------------------------------------------------------------------------------------------------------------------------------------------------------------------------------------------------------------------------------------------------------------------------------------------------------------------------------------------------------------------------------------------------------------------------------------------------------------------------------------------------------------------------------------------------------------------------------------------------------------------|
|                 | <ul style="list-style-type: none"> <li>• Respiratory system (BB)</li> <li>• Gastrointestinal system (BD)</li> <li>• Hepatobiliary System and Pancreas (BF)</li> <li>• Skin, subcutaneous tissue and breast (BH)</li> <li>• Non-axial upper bones (BP)</li> <li>• Axial skeleton, except skull and facial bones (BR), Urinary System (BT) or</li> <li>• Anatomical Region (BW)</li> </ul> <p>-Any code with "0" as first character indicating "Medical and Surgical Procedure" and as the third character, either "9" (Drainage), "B" (Excision), or "D" (Extraction) along with a code "X" indicating "Diagnostic Procedure" in the seventh position</p> | <p>-Introduce Liposome Antineoplastic into Peripheral Vein, XW033B3</p> <p>-Introduce T-cell Immunotherapy into Peripheral Vein, XW033C3</p> <p>-Introduce Antineoplastic Immunotherapy into Central Vein, XW04351</p> <p>-Introduce cytarabine/daunorubicin Antineoplastic in Central Vein, XW043B3</p> <p>-Introduce T-Cell Immunotherapy into Central Vein, XW043C3</p> <p><u>Radiation Oncology</u></p> <p>-Radiation /oncology procedure code, any code with first character value of "D"</p> <p><u>Surgical Procedures</u></p> <p>-Any code with "0" as first character indicating "Medical and Surgical Procedure" and as the third character, either "9" (Drainage), "B" (Excision), or "D" (Extraction)</p> |
| ICD-10-CM Codes |                                                                                                                                                                                                                                                                                                                                                                                                                                                                                                                                                                                                                                                          | <p><u>Chemotherapy</u></p> <p>-Encounter for antineoplastic chemotherapy and immunotherapy, Z51.1</p> <p><u>Radiation Oncology</u></p> <p>-Encounter for antineoplastic radiation therapy, Z51.0</p> <p>-Encounter for other specified aftercare, Z51.89</p> <p>-Encounter for follow-up examination after completed treatment for malignant neoplasm, Z08</p>                                                                                                                                                                                                                                                                                                                                                       |
